# Supplementary material
Source: PubMed Central journal article supplement (PMC2430978)
Supplement: NIHMS49870-supplement-01.pdf [file NIHMS49870-supplement-01.pdf]

S1

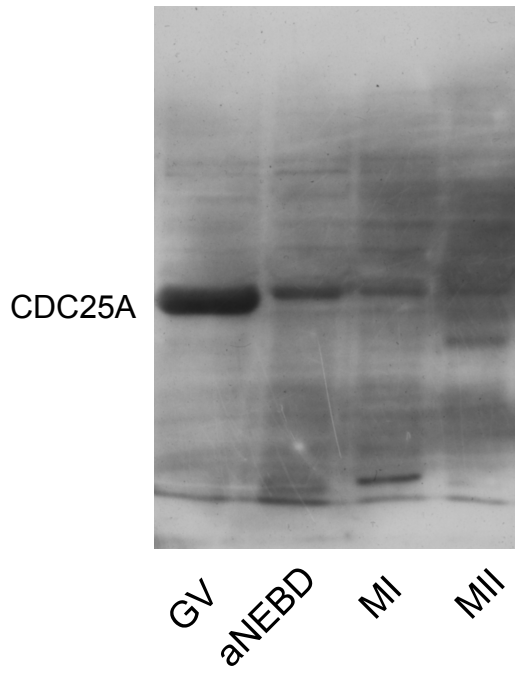

S2

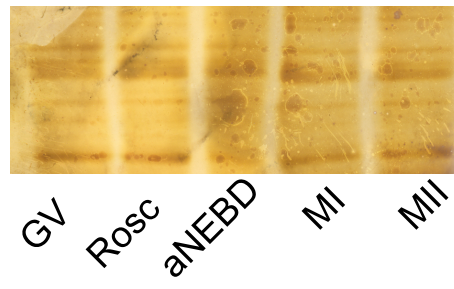

Supplementary data. S1: Entire western blot corresponding to the Fig. 1a. Unspecific bands over the lines demonstrate equal lane loading. Each line represents 400 cumulus free oocytes. S2: Part of nitrocellulose membrane corresponding to the western blot on the Fig.1c. Silver-staining demonstrates equal lane loading. Each line represents 400 cumulus free oocytes.
